# Weak support for the abundant niche-centre hypothesis in North American birds

Tad Dallas<sup>a, †, \*</sup>, Samuel Pironon<sup>b, \*</sup> and Luca Santini<sup>c, \*</sup>

<sup>a</sup>*Department of Biological Sciences, Louisiana State University, Baton Rouge, USA*

<sup>b</sup>*Royal Botanic Gardens, Kew, UK*

<sup>c</sup>*National Research Council, Institute of Research on Terrestrial Ecosystems (CNR-IRET), Via Salaria km 29.300, 00015, Monterotondo (Rome), Italy*

*\* All authors contributed equally*

† Corresponding author: [tad.a.dallas@gmail.com](mailto:tad.a.dallas@gmail.com)

1 **Author contributions:** All authors contributed equally.

2

3 **Data accessibility:** R code is available on figshare at

4 <https://figshare.com/s/8fadf780810e73d44623>.

5

6 **Funding:** TAD was supported by Louisiana State University.

7

8 **Competing interests:** The authors declare no competing interests.

9

10 **Abstract**

11 Species may be more abundant in the centre of their geographic range or climatic  
12 niche (the abundant-centre hypothesis). Recently, Osorio-Olvera *et al.* (2020) re-  
13 ported strong support for the niche abundant-centre relationship. We demonstrate  
14 here that methodological decisions strongly affected perceived abundant-centre  
15 support. Upon re-analysis, we show that abundant-centre relationships are quite  
16 rare.

17 The spatial distribution of abundance has long fascinated ecologists who searched  
18 for general rules governing where species occur and the density at which they are  
19 found (McGill *et al.*, 2007; Sagarin & Gaines, 2002). Particularly controversial  
20 rules are the abundant-centre and abundant-niche centre hypotheses, which pre-  
21 dict abundance to decrease gradually from the centre to the margins of species  
22 geographic ranges and ecological niches respectively (Brown, 1984; Pironon *et al.*,  
23 2017)). Both theories have received mixed empirical support (Martínez-Meyer  
24 *et al.*, 2013; Sagarin & Gaines, 2002; Dallas *et al.*, 2017) and limited theoretical  
25 development (Osorio-Olvera *et al.*, 2019; Holt, 2019). Moreover, recent analyses  
26 highlighted that tests of these hypotheses were sensitive to the quality of the input  
27 data and the methodological approach considered (Santini *et al.*, 2019).

28 Osorio-Olvera *et al.* (2020) analyze data from the North American Breeding Bird  
29 Survey (BBS) to test for a negative correlation between species abundance and the  
30 distance to their climatic niche centroid. Counter to recent findings questioning its  
31 generalizability (Sagarin & Gaines, 2002; Dallas *et al.*, 2017; Santini *et al.*, 2019),  
32 the authors find general support for the hypothesis and propose that the distance  
33 to species climatic niche centroid (quantified using minimum volume ellipsoids)  
34 could represent a reliable and simple new metric to predict the current and future  
35 distribution of species abundance. However, we show that, by (i) considering the  
36 full species environmental niche, (ii) reporting non-significant relationships and  
37 (iii) selecting models with the best fit only, overall conclusions may differ greatly.

38 To estimate the niche, Osorio-Olvera and colleagues contrast bird occurrence  
39 records with 10,000 background points sampled randomly all over the Americas  
40 including Canada and South America, i.e., a methodological approach that the  
41 authors point in the discussion as a potential reason why previous studies failed  
42 to support the abundant-niche centre relationship (Santini *et al.*, 2019). However,

43 many of the species considered in the study also occur in other continents (e.g.  
44 *Ardea alba*, *Corvus corax*), and some only share a very small portion of the range  
45 in the study area (e.g. *Thalasseus maximus*, *Aramus guarauna*). We calculated  
46 geographic and climatic niche overlap of the BBS data with the BirdLife Inter-  
47 national data (BirdLife International, 2017), demonstrating a clear influence on  
48 the estimation of the geographic range and climatic niche boundaries, as well as  
49 their centroids (Figure 1). This subsequently affects the abundant-niche centre re-  
50 lationship, as discussed in Soberón *et al.* (2018). Oddly, many of the bird species  
51 whose geographic ranges are underestimated [mean (sd) of geographic range over-  
52 lap = 55(27)%] and whose niches have been underestimated [mean (sd) of niche  
53 overlap = 53(23)%] also exhibit significant negative abundant-centre relationships,  
54 putatively supporting the hypothesis.

55 The strongest support for the abundant-niche centre relationships comes from  
56 Osorio-Olvera *et al.* (2020) estimating the species niche as a minimum volume  
57 ellipsoid (MVE) by considering more than 4000 combinations of climatic variables,  
58 including all 19 commonly-used bioclimatic variables together with the first 15  
59 PCA components of a PCA based on the same bioclimatic variables. The authors  
60 use every possible combination of two and three niche axes to estimate the niche.  
61 We identify two main issues associated with this procedure.

62 First, the authors report results only for models showing significant abundant-  
63 niche centre relationships, omitting non-significant correlations (Figure 2a). This  
64 issue is not only present in the fit MVE models, but also in the 2 and 3 fea-  
65 ture models using convex hulls or MVEs, which makes Figure 3 of Osorio-Olvera  
66 *et al.* (2020) quite a biased view of the abundant-niche centre relationship. In  
67 fact, by including non-significant correlations, the mean abundant-niche centre re-  
68 lationship across all model sets becomes quite weak ( $\bar{\rho} + -sd = -0.08 \pm 0.01$ ),

69 and many species exhibit significantly positive abundant-niche centre relationships  
70 (Figure 2b). Including these non-significant results is important, in our view, and  
71 strongly influences the resulting perceived support for the abundant-centre pat-  
72 tern (Figure 2b). Our re-analysis suggests that only between 37% and 45% of  
73 species have negative abundant-centre relationships, regardless of approach used  
74 (see <https://figshare.com/s/8fadf780810e73d44623>), while the majority of the es-  
75 timated relationships are either positive or non-significant. Interestingly, this low  
76 empirical support is consistent with previous findings for the geographic interpre-  
77 tation of the hypothesis (Pironon *et al.*, 2017; Sagarin & Gaines, 2002).

78 Second, while the authors train an average of 1,852 models per species to cal-  
79 culate MVEs, they perform no form of model selection. This functionally treats  
80 the poorest fit MVE and the best fit MVE as equivalent, provided the model pro-  
81 duced a significant abundant-centre relationship. When non-significant results are  
82 included, and only best models are retained, the overall pattern changes substan-  
83 tially (Figure 2; but note the niches are still biased to data in North America).  
84 When only the best fit models are considered, 115 out of 379 species had significant  
85 abundant-niche centre relationships, with a mean correlation coefficient of -0.07.  
86 Some of these best models had higher omission rates than what Osorio-Olvera  
87 *et al.* (2020) considered. Removing these models reduces the number of species  
88 down to 303 species, of which 94 had significantly negative abundant-niche centre  
89 relationships, while 180 and 29 had non-significant or significantly positive rela-  
90 tionships, respectively (Figure 2c). A large part of the presentation of the results  
91 in Osorio-Olvera *et al.* (2020) is dedicated to species that meet the expectations  
92 and exhibit higher abundance in areas closer to the centre of their niche (Fig.  
93 1 and 2 in Osorio-Olvera *et al.* (2020)), we note that a less biased overview of  
94 their findings shed doubts on the putative support for the abundant niche-centre

95 hypothesis.

96 The study from Osorio-Olvera *et al.* (2020) highlights the timely need for dis-  
97 entangling the complex relationship between species ecological niche, geographic  
98 distribution and demographic performance (Holt, 2019; Bohner & Diez, 2020). Ex-  
99 plaining the convergence and divergence of results of studies exploring occurrence  
100 and abundance patterns is key for improving our understanding of biodiversity  
101 and ability to predict its response to ongoing changes in the global environment.

## 102 **References**

103 BirdLife International (2017). Bird species distribution maps of the world. version  
104 6.0. Birdlife International, Cambridge, United Kingdom, and Lynx Edicions,  
105 Barcelona, Spain. Available from <http://datazone.birdlife.org/species/requestdis>  
106 (accessed June 2017).

107 Blonder, B., Blonder, M.B., Rcpp, D. & Rcpp, L. (2015). Package hypervolume.  
108 *Global Ecology and Biogeography*, 23, 595–609.

109 Bohner, T. & Diez, J. (2020). Extensive mismatches between species distributions  
110 and performance and their relationship to functional traits. *Ecology Letters*, 23,  
111 33–44.

112 Brown, J.H. (1984). On the relationship between abundance and distribution of  
113 species. *The American Naturalist*, 124, 255–279.

114 Dallas, T., Decker, R.R. & Hastings, A. (2017). Species are not most abundant  
115 in the centre of their geographic range or climatic niche. *Ecology letters*, 20,  
116 1526–1533.

117 Holt, R.D. (2019). Reflections on niches and numbers. *Ecography*, pp. 1–4.

118 Martínez-Meyer, E., Díaz-Porrás, D., Peterson, A.T. & Yáñez-Arenas, C. (2013).  
119 Ecological niche structure and rangewide abundance patterns of species. *Biology*  
120 *Letters*, 9, 20120637.

121 McGill, B.J., Etienne, R.S., Gray, J.S., Alonso, D., Anderson, M.J., Benecha, H.K.,  
122 Dornelas, M., Enquist, B.J., Green, J.L., He, F. *et al.* (2007). Species abundance  
123 distributions: moving beyond single prediction theories to integration within an  
124 ecological framework. *Ecology Letters*, 10, 995–1015.

- 125 Osorio-Olvera, L., Soberón, J. & Falconi, M. (2019). On population abundance  
126 and niche structure. *Ecography*, 42, 1415–1425.
- 127 Osorio-Olvera, L., Yañez-Arenas, C., Martínez-Meyer, E. & Peterson, A.T. (2020).  
128 Relationships between population densities and niche-centroid distances in north  
129 american birds. *Ecology Letters*.
- 130 Pironon, S., Papuga, G., Vilellas, J., Angert, A.L., García, M.B. & Thompson,  
131 J.D. (2017). Geographic variation in genetic and demographic performance:  
132 new insights from an old biogeographical paradigm. *Biological Reviews*, 92,  
133 1877–1909.
- 134 Sagarin, R.D. & Gaines, S.D. (2002). The “abundant centre” distribution: to what  
135 extent is it a biogeographical rule? *Ecology Letters*, 5, 137–147.
- 136 Santini, L., Pironon, S., Maiorano, L. & Thuiller, W. (2019). Addressing common  
137 pitfalls does not provide more support to geographical and ecological abundant-  
138 centre hypotheses. *Ecography*, 42, 696–705.
- 139 Soberón, J., Peterson, A.T. & Osorio-Olvera, L. (2018). A comment on "species  
140 are not most abundant in the center of their geographic range or climatic niche".  
141 *Rethinking Ecology*, pp. 13–18.



142 **Figures**

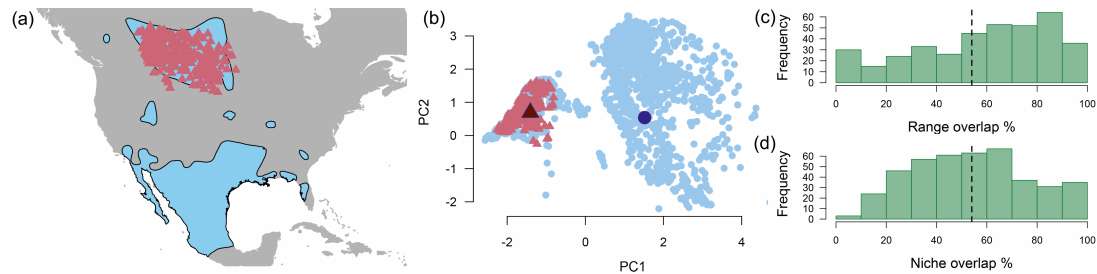

Figure 1: Mismatch in geographic and niche estimate between abundance data used in Osorio-Olvera *et al.* (2020) and the full resident and breeding range distribution of species, estimated IUCN range polygons. We acknowledge, as others previously have Soberón *et al.* (2018), that IUCN polygons may not capture a species actual range. **a)** Sprague’s pipit (*Anthus spragueii*) IUCN geographic range (in blue) and sample data to estimate the niche (in red); **b)** First two PCA axes of all bioclimatic variables showing environmental values considered in the study (red triangles) and those estimated considering the cells in the IUCN range (blue dots). The darker and larger triangle and circle represent the estimated centroids of the two hypervolumes; **c)** Distribution of geographic range overlap between convex hulls drawn around abundance estimates and the IUCN ranges for all species considered in the study; **d)** Distribution of niche overlap between convex hulls drawn around abundance estimates and grid cells within the IUCN ranges for all species in the study. Niche overlap and niche centroids were estimated using the hypervolume package Blonder *et al.* (2015).

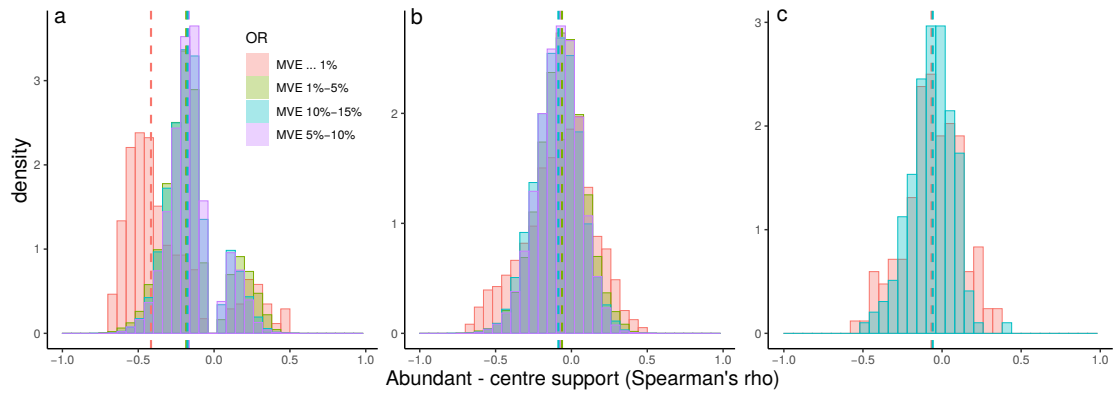

Figure 2: Variation in support for the abundant-niche centre hypothesis across North American birds as a function of analytical decisions involved in the formation of over 700,000 models of species Minimum Volume Ellipsoids (MVEs). **a**) the reproduced results from Osorio-Olvera *et al.* (2020) showing predominantly negative abundant-centre relationships, especially when omission rates were low; **b**) the effect of including non-significant abundant-niche centre relationships. **c**) only considering the best fit MVE model for a given species instead of using all fit models, while also considering that the best fit model could have a non-significant abundant-centre relationship.
